# Supplementary material for: Efficacy of Plasma Exchange Treatment for Demyelinating Optic Neuritis Associated with Various Serum Antibodies: A Prospective Cohort Study
Source: Springer Nature journal article supplement (doi:10.1007/s40120-022-00344-w), 2022-04-09
Supplement: MOESM1 [file 20298788]

**Efficacy of Plasma Exchange Treatment for Demyelinating Optic Neuritis Associated with Various Serum Antibodies: A Prospective Cohort Study**

<sup>1,2</sup>Junxia Fu, M.Med, <sup>1,2</sup>Yongping Wang, M.Med, <sup>3</sup>Hongen Li, Ph.D, <sup>2</sup>Huanfen Zhou, Ph.D, <sup>3,4</sup>Honglu Song, Ph.D, <sup>3</sup>Mingming Sun, Ph.D, <sup>3</sup>Quangang Xu, Ph.D, <sup>5,6,7\*</sup>Shaoying Tan, Ph.D, <sup>1,2,\*</sup>Shihui Wei, M.D

<sup>1</sup>The Chinese People's Liberation Army Medical School, Beijing, China

<sup>2</sup>Department of Ophthalmology, The Chinese People's Liberation Army General Hospital, Beijing, China

<sup>3</sup>Senior Department of Ophthalmology, The Third Medical Center of PLA General Hospital, Beijing, China

<sup>4</sup>Department of Ophthalmology, The 980th Hospital of the Chinese PLA Joint Logistics Support Force, Beijing, China

<sup>5</sup>School of Optometry, The Hong Kong Polytechnic University, Hong Kong SAR, China

<sup>6</sup>Research Centre for SHARP Vision (RCSV), The Hong Kong Polytechnic University, Kowloon, Hong Kong SAR, China

<sup>7</sup>Center for Eye and Vision Research (CEVR), 17W Hong Kong Science Park, Hong Kong

**\* Correspondence:**

Dr. Shaoying Tan

School of Optometry, The Hong Kong Polytechnic University, 11 Yuk Choi Rd, Hung Hum, Kowloon, Hong Kong SAR, China

Email: [shaoying.tan@polyu.edu.hk](mailto:shaoying.tan@polyu.edu.hk); Phone: +852 2766 6342; Fax: +852 2764 6051

Prof. Shihui Wei

Department of Ophthalmology, The Chinese People's Liberation Army Medical School, The Chinese People's Liberation Army General Hospital, Beijing, 100853, China

Email: [weishihui706@hotmail.com](mailto:weishihui706@hotmail.com); Phone: +86 10 66938009; Fax: +86 10 68187998

**Table S1.** Visual acuity of the studied eyes in optic neuritis patients with different antibody subtypes during different time points.

|                                 | Total           | AQP4-Ab positive group | Double-Ab negative group | MOG-Ab positive group |
|---------------------------------|-----------------|------------------------|--------------------------|-----------------------|
| BCVA (logMAR, mean±SD)          |                 |                        |                          |                       |
| The worst acuity at onset (n)   | 3.42±1.49 (124) | 3.33±1.51 (96)         | 3.95±1.23 (22)           | 2.93±1.77 (6)         |
| Before IVMP treatment (n)       | 3.19±1.60 (124) | 3.16±1.63 (96)         | 3.40±1.47 (22)           | 2.93±1.77 (6)         |
| After IVMP treatment (n)        | 2.92±1.30 (124) | 2.81±1.28 (96)         | 3.37±1.21 (22)           | 2.92±1.80 (6)         |
| Before PE treatment (n)         | 2.34±1.30 (124) | 2.22±1.21 (96)         | 2.75±1.45 (22)           | 2.69±1.93 (6)         |
| After five-cycle PE therapy (n) | 1.79±1.31 (124) | 1.61±1.14 (96)         | 2.59±1.57 (22)           | 1.89±1.89 (6)         |
| Snellen BCVA > 20/200 (n, %)    | 25 (20%)        | 22 (22.9%)             | 3 (13.6%)                | 2 (33.3%)             |
| Snellen BCVA > 20/40 (n, %)     | 8 (6.4%)        | 8 (8.3%)               | 0                        | 2 (33.3%)             |
| Follow-up visit                 |                 |                        |                          |                       |
| 1-month (n)                     | 1.96±1.52 (105) | 1.87±1.46 (83)         | 2.47±1.69 (16)           | 1.85±1.93 (6)         |
| 3-month (n)                     | 2.05±1.57 (94)  | 1.94±1.49 (77)         | 2.95±1.77 (11)           | 1.85±1.93 (6)         |
| 6-month (n)                     | 1.92±1.60 (99)  | 1.85±1.52 (80)         | 2.39±1.96 (13)           | 1.85±1.93 (6)         |

Abbreviations: AQP4=aquaporin-4; MOG=myelin oligodendrocyte glycoprotein; Ab=antibody; BCVA=best corrected visual acuity; logMAR=log of the minimum angle of resolution; IVMP=intravenous methylprednisolone; PE=plasma exchange; n=number of eyes; SD=standard deviation.

**Table S2.** Major clinical characteristics of the recruited optic neuritis patients with MOG-Ab positive.

|                                         | Patient 1 | Patient 2 | Patient 3 | Patient 4 | Patient 5 | Patient 6 |
|-----------------------------------------|-----------|-----------|-----------|-----------|-----------|-----------|
| Gender                                  | male      | male      | female    | female    | female    | male      |
| Age of onset (years)                    | 15        | 47        | 14        | 54        | 45        | 17        |
| Age of PE initiation (years)            | 22        | 47        | 20        | 54        | 48        | 37        |
| Bilateral eye involved                  | No        | Yes       | No        | Yes       | No        | No        |
| Disease duration (years)                | 7         | 0         | 6         | 0         | 3         | 20        |
| History of ON                           | Yes       | No        | Yes       | No        | Yes       | Yes       |
| BMI (kg/m <sup>2</sup> )                | 20.8      | 20.8      | 18.6      | 21.5      | 20.2      | 26.8      |
| Time, days                              |           |           |           |           |           |           |
| Onset to IVMP window                    | 3         | 8         | 12        | 1         | 9         | 1         |
| Onset to PE window                      | 11        | 75        | 18        | 19        | 13        | 38        |
| IVMP initiation to PE initiation window | 8         | 67        | 6         | 18        | 4         | 37        |
| Snellen BCVA                            |           |           |           |           |           |           |
| The worst acuity at onset               | 20/50     | NLP       | LP        | NLP       | 20/500    | HM        |
| Before IVMP treatment                   | 20/50     | NLP       | LP        | NLP       | 20/500    | HM        |
| After IVMP treatment                    | 20/40     | NLP       | LP        | NLP       | 20/500    | HM        |
| Before PE treatment                     | 20/30     | NLP       | LP        | NLP       | 20/500    | CF        |
| After five-cycle PE therapy             | 20/25     | NLP       | LP        | 20/30     | 20/300    | CF        |
| 1-month follow-up visit                 | 20/20     | NLP       | LP        | 20/25     | 20/300    | CF        |
| 3-month follow-up visit                 | 20/20     | NLP       | LP        | 20/25     | 20/300    | CF        |
| 6-month follow-up visit                 | 20/20     | NLP       | LP        | 20/25     | 20/300    | CF        |

Abbreviations: MOG=myelin oligodendrocyte glycoprotein; Ab=antibody; ON=optic neuritis; BMI=body mass index; IVMP=intravenous methylprednisolone; PE=plasma exchange; NLP=no light perception; LP=light perception; HM=hand movement; CF=finger counting; BCVA=best correct visual acuity.

**Table S3.** The number and percentage of eyes in each visual outcome categories along with different time points in AQP4-Ab positive group.

| Visual outcome                   | worst VA at onset | before IVMP | after IVMP | before PE  | after PE          | 1-month           | 3-month           | 6-month           |
|----------------------------------|-------------------|-------------|------------|------------|-------------------|-------------------|-------------------|-------------------|
| Total                            | 96                | 96          | 96         | 96         | 96                | 83                | 77                | 80                |
| NLP                              | 46 (47.9%)        | 44 (45.8%)  | 15 (15.6%) | 12 (12.5%) | 6 (6.3%)          | 11 (13.3%)        | 11 (14.3%)        | 12 (15.0%)        |
| LP                               | 11 (11.5%)        | 10 (10.4%)  | 27 (28.1%) | 6 (6.3%)   | 4 (4.2%)          | 6 (7.2%)          | 6 (7.8%)          | 4 (5.0%)          |
| HM                               | 7 (7.3%)          | 5 (5.2%)    | 19 (19.8%) | 20 (20.8%) | 10 (10.4%)        | 9 (10.8%)         | 9 (11.7%)         | 9 (11.3%)         |
| CF                               | 11 (11.5%)        | 16 (16.7%)  | 10 (10.4%) | 24 (25.0%) | 21 (21.9%)        | 15 (18.1%)        | 12 (15.6%)        | 10 (12.5%)        |
| 20/800 $\geq$ VA > 20/2000       | 10 (10.4%)        | 6 (6.3%)    | 12 (12.5%) | 15 (15.6%) | 6 (6.3%)          | 5 (6.0%)          | 5 (6.5%)          | 7 (8.8%)          |
| 20/200 $\geq$ VA > 20/800        | 7 (7.3%)          | 9 (9.4%)    | 8 (8.3%)   | 12 (12.5%) | 26 (27.1%)        | 18 (21.7%)        | 18 (23.4%)        | 17 (21.3%)        |
| 20/60 $\geq$ VA > 20/200         | 2 (2.1%)          | 2 (2.1%)    | 1 (1%)     | 3 (3.1%)   | 11 (11.5%)        | 4 (4.8%)          | 4 (5.2%)          | 3 (3.8%)          |
| 20/30 $\geq$ VA > 20/60          | 1 (1%)            | 1 (1%)      | 4 (4.2%)   | 4 (4.2%)   | 7 (7.3%)          | 7 (8.4%)          | 5 (6.5%)          | 8 (10%)           |
| Scotoma but VA better than 20/30 | 1 (1%)            | 2 (2.1%)    | 0 (0%)     | 0 (0%)     | 3 (3.1%)          | 4 (4.8%)          | 3 (3.9%)          | 5 (6.3%)          |
| 20/20                            | 0 (0%)            | 1 (1%)      | 0 (0%)     | 0 (0%)     | 2 (2.1%)          | 4 (4.8%)          | 4 (5.2%)          | 5 (6.3%)          |
| Adjust $P^a$                     | 0.999             | -           | 0.999      | 0.083      | <b>&lt; 0.001</b> | <b>&lt; 0.001</b> | <b>&lt; 0.001</b> | <b>&lt; 0.001</b> |
| Adjust $P^b$                     | <b>0.001</b>      | 0.083       | 0.553      | -          | <b>0.002</b>      | 0.999             | 0.999             | 0.999             |

Bold:  $P < 0.05$ .

Abbreviations: AQP4=aquaporin-4; Ab=antibody; NLP=no light perception; LP=light perception; HM=hand movement; CF=finger counting; VA=visual acuity; IVMP= intravenous methylprednisolone; PE=plasma exchange.

a: compared to before IVMP treatment; b: compared to before PE treatment.

**Table S4.** Predictive factors associated with the visual improvement  $\geq 2$  scores after the fifth-cycle PE treatment in AQP4-ON group.

| Factors                                            | <i>P</i>     | OR (95%CI)              |
|----------------------------------------------------|--------------|-------------------------|
| Bilateral affected versus unilateral               | 0.999        | 3.5*10 <sup>8</sup> (-) |
| logMAR VA before PE                                | 0.979        | 1.006 (0.626-1.619)     |
| BMI at PE treatment                                | 0.750        | 0.980 (0.865-1.111)     |
| Thicknesses of mILM-RPE                            | 0.681        | 1.007 (0.975-1.040)     |
| Time window from onset to IVMP treatment per 1 day | 0.454        | 0.973 (0.905-1.046)     |
| Female versus male                                 | 0.464        | 0.430 (0.045-4.132)     |
| Disease duration per 1 year                        | 0.428        | 1.070 (0.905-1.264)     |
| Disease phenotype (ON versus ON+others)            | 0.462        | 2.577 (0.207-32.065)    |
| Thicknesses of pRNFL                               | 0.468        | 1.006 (0.990-1.021)     |
| History of autoimmune disease                      | 0.208        | 3.242 (0.519-20.237)    |
| Age of PE treatment per 1 year                     | 0.080        | 1.042 (0.995-1.092)     |
| Number of previous ON episodes                     | <b>0.048</b> | 0.555 (0.309-0.996)     |
| Time window from onset to PE treatment per 1 day   | <b>0.003</b> | 0.948 (0.915-0.982)     |

Multiple logistic regression analysis with visual improvement (visual improvement  $\geq 2$  scores versus visual improvement  $< 2$  scores) after five-cycle PE therapy in the AQP4-ON group as a dependent variable.

Bold:  $P < 0.05$

Abbreviations: AQP4=aquaporin-4; ON=optic neuritis; BMI=body mass index; IVMP=intravenous methylprednisolone; PE=plasma exchange; pRNFL=peripheral retinal nerve fiber layer; mILM-RPE= macular inner limiting membrane retinal pigment epithelium; logMAR=log of the minimum angle of resolution; VA=visual acuity; CI=confidence interval; OR=odds ratio.

**Table S5.** Predictive factors associated with the visual acuity < 1.0 logMAR after the fifth-cycle PE treatment in AQP4-ON group.

| Factors                                            | <i>P</i>     | OR (95%CI)           |
|----------------------------------------------------|--------------|----------------------|
| BMI at PE treatment                                | 0.871        | 1.016 (0.838-1.231)  |
| Female versus male                                 | 0.797        | 1.435 (0.091-22.626) |
| Disease duration per 1 year                        | 0.746        | 0.971 (0.811-1.162)  |
| Thickesses of pRNFL                                | 0.391        | 1.008 (0.990-1.026)  |
| Disease phenotype (ON versus ON+others)            | 0.322        | 0.098 (0.001-9.779)  |
| Time window from onset to IVMP treatment per 1 day | 0.296        | 0.881 (0.695-1.117)  |
| Number of previous ON episodes                     | 0.194        | 0.548 (0.221-1.359)  |
| History of autoimmune disease                      | 0.317        | 0.388 (0.061-2.478)  |
| Age of PE treatment per 1 year                     | 0.096        | 1.061 (0.989-1.138)  |
| Bilateral affected versus unilateral               | <b>0.047</b> | 0.042 (0.002-0.964)  |
| Time window from onset to PE treatment per 1 day   | <b>0.009</b> | 0.929 (0.879-0.982)  |
| logMAR VA before PE                                | <b>0.001</b> | 0.190 (0.069-0.527)  |
| Thickesses of mILM-RPE                             | 0.097        | 1.037 (0.993-1.083)  |

Multiple logistic regression analysis with visual acuity (visual acuity < 1.0 logMAR versus visual acuity  $\geq$  1.0 logMAR) after five-cycle PE therapy in the AQP4-ON group as a dependent variable.

Bold:  $P < 0.05$ .

Others include transverse myelitis and posterior zone syndrome

Abbreviations: AQP4=aquaporin-4; ON=optic neuritis; BMI=body mass index; IVMP=intravenous methylprednisolone; PE=plasma exchange; pRNFL=peripheral retinal nerve fiber layer; mILM-RPE= macular inner limiting membrane retinal pigment epithelium; logMAR=log of the minimum angle of resolution; VA=visual acuity; CI=confidence interval; OR=odds ratio.

**Table S6.** Visual improvement scores among different time windows (from onset to PE treatment) in AQP4-Ab positive group.

| Time window (days) | Improvement score |            |           |           |           |          |          | Total |
|--------------------|-------------------|------------|-----------|-----------|-----------|----------|----------|-------|
|                    | -1                | 0          | 1         | 2         | 3         | 4        | 5        |       |
| 9-20               | 0                 | 5 (18.5%)  | 9 (33.3%) | 6 (22.2%) | 4 (14.8%) | 2 (7.4%) | 1 (3.7%) | 27    |
| 21-30              | 0                 | 8 (32%)    | 9 (36%)   | 3 (12%)   | 3 (12%)   | 1 (4%)   | 1 (4%)   | 25    |
| 31-60              | 0                 | 11 (42.3%) | 6 (23.1%) | 6 (23.1%) | 2 (7.7%)  | 1 (3.8%) | 0        | 26    |
| 61-157             | 1 (5.6%)          | 10 (55.6%) | 6 (33.3%) | 1 (5.6%)  | 0         | 0        | 0        | 18    |

Abbreviations: AQP4=aquaporin-4; Ab=antibody
